# Supplementary material
Source: Springer Nature journal article supplement (https://www.springermedizin.de/resource/supplementary/12885_2010_2253_MOESM11_ESM.pdf/9460862)

A

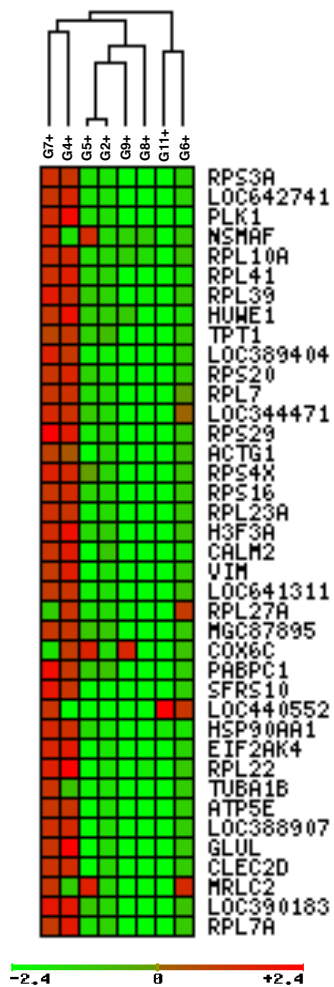

B

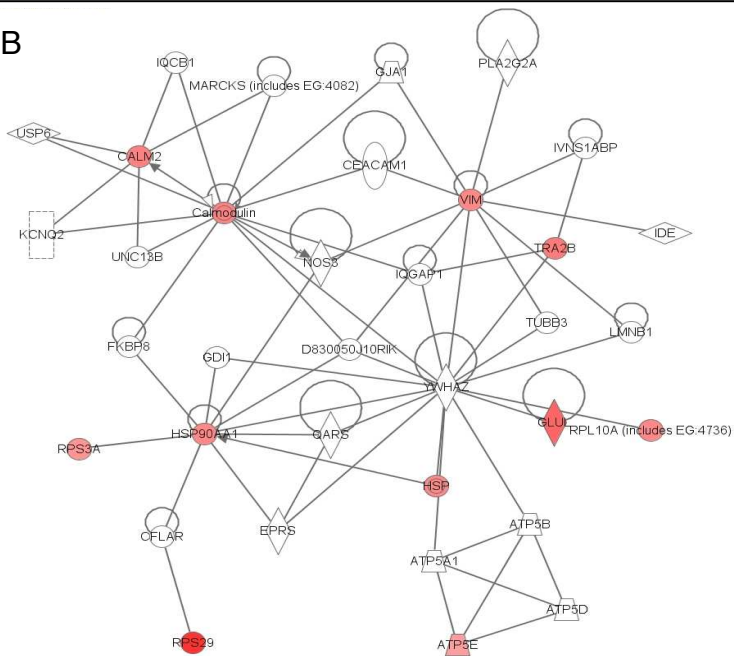

© 2000-2010 Ingenuity Systems, Inc. All rights reserved.

C

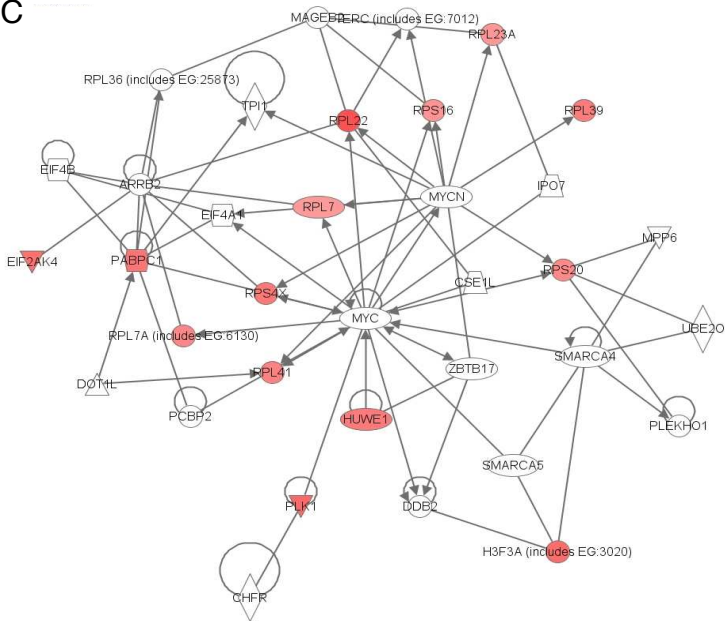

© 2000-2010 Ingenuity Systems, Inc. All rights reserved.

Supplement: MOESM11 [file 9460862]
